## 2D or Not 2D? An fMRI Study of How Dogs Visually Process Objects

Ashley Prichard<sup>1</sup>, Raveena Chhibber<sup>1</sup>, Kate Athanassiades<sup>1</sup>, Veronica Chiu<sup>1</sup>, Mark Spivak<sup>2</sup>, & Gregory S. Berns<sup>1\*</sup>

<sup>1</sup>Psychology Department, Emory University, Atlanta, GA 30322

<sup>2</sup>Comprehensive Pet Therapy, Inc., Sandy Springs, GA 30328

\*Corresponding Author: Gregory S. Berns ([gregory.berns@emory.edu](mailto:gregory.berns@emory.edu))

### Funding

This work was supported by the Office of Naval Research (N00014-16-1-2276). ONR provided support in the form of salaries [RC, MS, GSB], scan time, and volunteer payment, but did not have any additional role in the study design, data collection and analysis, decision to publish, or preparation of the manuscript.

### Competing Interests

G.B. & M.S. own equity in Dog Star Technologies and developed technology used in some of the research described in this paper. The terms of this arrangement have been reviewed and approved by Emory University in accordance with its conflict of interest policies.

### Ethics Statement

This study was performed in accordance with the recommendations in the Guide for the Care and Use of Laboratory Animals of the National Institutes of Health. The study was approved by the Emory University IACUC (Protocols DAR-2002879-091817BA and DAR-4000079-ENTPR-A), and all owners gave written consent for their dog's participation in the study.

### Data Availability

The datasets generated during the current study are available from the corresponding author on reasonable request.

### Acknowledgments

Thank you to all of the owners who trained their dogs to participate in fMRI studies: Lorrie Backer, Rebecca Beasley, Emily Chapman, Darlene Coyne, Vicki D'Amico, Diana Delatour, Jessa Fagan, Marianne Ferraro, Anna & Cory Inman, Patricia King, Cecilia Kurland, Claire & Josh Mancebo, Patti Rudi, Cathy Siler, Lisa Tallant, Nicole & Sairina Merino Tsui, Ashwin Sakhardande, & Yusuf Uddin.

### Author Contributions

A.P. and G.B. designed the research; A.P., R.C., K.A., V.C. and G.B. collected the data; A.P, M.S. and G.B trained the dogs, A.P. and G.B. analyzed data; and A.P. and G.B. wrote the paper.

### Keywords

Dogs, fMRI, 2D, 3D, objects, brain

## ABSTRACT

44  
45  
46  
47  
48  
49  
50  
51  
52  
53  
54  
55  
56  
57  
58  
59

Given humans' habitual use of screens, they rarely consider potential differences when viewing two dimensional (2D) stimuli and real-world versions of dimensional stimuli. Dogs also have access to many forms of screens and touch pads, with owners even subscribing to dog-directed content. Humans understand that 2D stimuli are representations of real-world objects, but do dogs? In canine cognition studies, 2D stimuli are almost always used to study what is normally 3D, like faces, and may assume that both 2D and 3D stimuli are represented in the brain the same way. Here, we used awake fMRI of 15 dogs to examine the neural mechanisms underlying dogs' perception of two- and three-dimensional objects after the dogs were trained on either a two- or three-dimensional version of the objects. Activation within reward processing regions and parietal cortex of the dog brain to 2D and 3D versions of objects was determined by their training experience, as dogs trained on one dimensionality showed greater activation to the dimension on which they were trained. These results show that dogs do not automatically generalize between two- and three-dimensional stimuli and caution against implicit assumptions when using pictures or videos with dogs.

## INTRODUCTION

60  
61  
62       Studies of canine cognition frequently rely on two-dimensional (2D) pictures to test  
63 dogs' ability to discriminate between objects, species, or faces (Albuquerque et al. 2016; Autier-  
64 Derian et al. 2013; Barber et al. 2016; Huber et al. 2013; Muller et al. 2015; Pitteri et al. 2014;  
65 Wallis et al. 2017). Visual stimuli for these studies are utilized because they are easy to obtain  
66 from studies on humans and nonhuman primates and are easy to implement in laboratory  
67 settings. But the ecological validity of this line of research hinges on the extent to which the  
68 findings transfer to real-world stimuli and contexts (Romero and Snow 2019). As dogs may not  
69 perceive 2D visual stimuli as humans do, are images appropriate stimuli for the study of dog  
70 cognition?

71       Visual stimuli are often selected without considering the nature of dogs' visual  
72 perception (Miller and Murphy 1995). For example, dogs have a higher flicker fusion rate than  
73 humans. This means that they may perceive the flickering of a video display if the refresh rate is  
74 too low. With movies, dogs may notice a gap or flicker between frames. Dogs also have a visual  
75 streak as opposed to a fovea (as in primates), causing increased sensitivity to stimuli in the  
76 periphery of the visual field. This means that displaying a picture or playing a video to a dog  
77 may not accurately reflect what a dog sees in the real world because they may focus on  
78 different aspects of the video than we do (Byosiere et al. 2018; Byosiere et al. 2019). Although  
79 there is ample evidence that dogs can perceptually discriminate features of images, this does  
80 not mean that the images necessarily represent their real-world counterparts to the dog.

81       Research in canines and other nonhumans that utilize pictures share an underlying  
82 assumption that, like humans, dogs perceive 2D stimuli such as faces as similar to real 3D faces.

83 Dogs do behaviorally differentiate pictures, as they can discriminate between pictures of  
84 human facial expressions and between pictures of familiar and strange dogs or humans (Autier-  
85 Derian et al. 2013; Barber et al. 2016; Huber et al. 2013; Muller et al. 2015; Pitteri et al. 2014;  
86 Somppi et al. 2012), and following substantial training, dogs show the ability to follow  
87 commands presented by humans through video projection (Pongracz et al. 2003). One study  
88 reported dogs' use of duplicates of the objects or miniature versions as referents to retrieve the  
89 corresponding objects, concluding that dogs can use iconic representations (Kaminski et al.  
90 2009). However, the same dogs did not perform well using pictures versions of the  
91 corresponding objects. Despite this widespread use of 2D visual stimuli in canine cognition,  
92 studies have not shown that dogs use 2D stimuli as referents for real world stimuli.

93         The ability to abstract from 2D to 3D versions of objects is not uniquely human. Many  
94 nonhuman species show evidence of behavioral transfer from pictures or videos to objects,  
95 pictures of food, or conspecifics following substantial training (Bovet and Vauclair 2000;  
96 Johnson-Ulrich et al. 2016; Wilkinson et al. 2013). This means that there is little evidence for 2D  
97 to 3D transfer happening naturalistically in a nonhuman species. Nor does recognition between  
98 pictures mean that the animal has abstract knowledge of objects, that they have formed a  
99 mental representation, or that they equate pictures and real world objects (Jitsumori 2010;  
100 Weisman and Spetch 2010).

101         Using functional magnetic resonance imaging (fMRI), regions of the primate brain have  
102 been identified as selective for processing specific types of visual stimuli, including the fusiform  
103 face area (FFA) for processing faces or the lateral occipital complex (LOC) for processing objects  
104 (Beauchamp et al. 2004; Durand et al. 2007; Eger et al. 2008; Janssen et al. 2018; Kourtzi and

105 Kanwisher 2000; Kriegeskorte et al. 2008). Yet these fMRI studies have a similar caveat: they  
106 too rely on 2D visual stimuli as proxies for real-world stimuli and use subjects who are overly  
107 familiar with pictures.

108         There is some evidence that object processing regions of the human brain respond  
109 differently to 2D and 3D versions of stimuli. An fMRI study that directly compared neural  
110 activation within the LOC to real world objects and 2D versions of the same objects found that  
111 the LOC does not respond to the two versions of stimuli in the same way (Snow et al. 2011). In  
112 behavioral studies, real objects also prompt greater attention and memory retrieval than 2D  
113 images, and elicit goal-directed actions whereas 2D images do so to a lesser degree (Gomez et  
114 al. 2018; Snow et al. 2014). Goal directed actions, such as grasping, are difficult to generalize to  
115 2D versions of objects because 2D versions lack the same binocular cues or proprioceptive  
116 feedback (Freud et al. 2018; Gallivan and Culham 2015; Hutchison and Gallivan 2018).

117         As in human studies of vision, fMRI can be used to elucidate the neural mechanisms  
118 underlying dogs' perception of objects. FMRI studies of awake dogs have increased in  
119 complexity and duration, paralleling human fMRI studies. Canine studies show that stimulus-  
120 reward associations acquired prior to or during scanning are learned at different rates due to  
121 neural biases within the reward-processing regions of the brain, such as the caudate and  
122 amygdala (Cook et al. 2016; Prichard et al. 2018a). Dogs also process familiar human words  
123 associated with objects in similar language-processing regions of humans, like the temporal-  
124 parietal junction, and show greater activation to novel words versus familiar words (Prichard et  
125 al. 2018b). As in human imaging, functional localizers have also revealed areas of dogs' occipital  
126 cortex selective for processing human and dog faces (Cuaya et al. 2016; Dilks et al. 2015; Szabo

127 et al. 2020; Thompkins et al. 2018). Together these studies show that activation within areas of  
128 the dog brain can be used to predict perceptual or behavioral biases when processing visual  
129 stimuli.

130 In two separate studies, we used fMRI to measure activity in dogs' brains in response to  
131 both objects and pictures of the objects. In Study 1, 15 dogs were split into two groups; dogs in  
132 the first group were trained on two 3D objects, and dogs in the second group were trained on  
133 two pictures of the objects. One stimulus was associated with reward and the other with  
134 nothing. During the fMRI session, dogs from both groups were presented with both the picture  
135 stimuli and object stimuli. If hedonic mechanisms facilitate abstraction from 2D to 3D (and vice-  
136 versa), then dogs should show greater neural activity in the caudate for the trained reward  
137 stimulus than the no reward stimulus, regardless of whether they were trained on objects or  
138 pictures. In Study 2, we developed a functional localizer for object processing regions analogous  
139 to LOC. If dogs equate 2D and 3D stimuli, then they should show no difference in neural activity  
140 between the object and the picture in these regions.

## 141 **MATERIALS AND METHODS**

### 142 *Participants*

143 Participants for both studies were 15 pet dogs volunteered by their Atlanta owners for  
144 fMRI training and fMRI studies (Prichard et al. 2018a) (Table 1). Each dog had previously  
145 completed two or more scans for the project and had demonstrated the ability to participate in  
146 MRI scans.

147 *General Experimental Design*

148           The experimental design was similar to previous dog fMRI studies that examined  
149 preference using visual stimuli associated with food or social reward (Cook et al. 2016). Briefly,  
150 dogs entered and positioned themselves in custom chin rests in the scanner bore. All scans took  
151 place in the presence of the dog's owner, who stood out of view of the dogs throughout the  
152 scan near the opening of the scanner bore and delivered all rewards (hot dogs) to the dog. An  
153 experimenter was stationed next to the owner, out of view of the dog, where the experimenter  
154 controlled the presentation of stimuli to the dogs. The onset and offset of each stimulus were  
155 timestamped by the simultaneous press of a four-button MRI-compatible button box by the  
156 experimenter.

157 *Imaging*

158           Scanning was conducted with a Siemens 3 T Trio whole-body scanner using procedures  
159 described previously (Berns et al. 2013; Berns et al. 2012; Prichard et al. 2018a; Prichard et al.  
160 2018b). The functional scans used a single-shot echo-planar imaging (EPI) sequence to acquire  
161 volumes of 22 sequential 2.5 mm slices with a 20% gap (TE = 25 ms, TR = 1260 ms, flip angle =  
162 70°, 64 x 64 matrix, 2.5 mm in-plane voxel size, FOV = 192 mm). Slices were oriented dorsally to  
163 the dog's brain (coronal to the magnet, as in the sphinx position the dogs' heads were  
164 positioned 90 degrees from the prone human orientation) with the phase-encoding direction  
165 right-to-left. Four runs of up to 400 functional volumes were acquired for each subject, with  
166 each run lasting about 9 minutes. Following functional scans, a T2-weighted structural image of  
167 the whole brain was acquired using a turbo spin-echo sequence (25-36 2mm slices, TR = 3940  
168 ms, TE = 8.9 ms, flip angle = 131°, 26 echo trains, 128 x 128 matrix, FOV = 192 mm).

169 *Preprocessing*

170           Preprocessing was the same as described in previous studies (Berns et al. 2013; Prichard  
171 et al. 2018a). Briefly, preprocessing of the fMRI data included motion correction, censoring, and  
172 normalization using AFNI (NIH) and its associated functions. A hand-selected reference volume  
173 for each dog that corresponded to their average position within the magnet bore across runs  
174 was used for two-pass, six-parameter rigid-body motion correction. Aggressive censoring  
175 removed unusable volumes from the fMRI time sequence because dogs can move between  
176 trials and when consuming rewards. Data were censored when estimated motion was greater  
177 than 1 mm displacement scan-to-scan and also based on outlier voxel signal intensities. A mask  
178 was drawn in functional space for each dog in the cerebellum, which was used to censor the  
179 data further by removing volumes where the beta values extracted from the cerebellum were  
180 assumed to be beyond the physiologic range of the BOLD signal ( $> |3$  percent signal change |)  
181 for each trial. Smoothing, normalization, and motion correction parameters were identical to  
182 those described in previous studies (Prichard et al. 2018a). EPI images were smoothed and  
183 normalized to %-signal change with 3dmerge using a 6mm kernel at full-width half-maximum.  
184 The Advanced Normalization Tools (ANTs) software was used to spatially normalize the mean of  
185 the motion-corrected functional images (Avants et al. 2011) to the individual dog's structural  
186 image. We also performed a nonlinear transformation from each dog's structural image to a  
187 high-resolution canine brain atlas, developed from a previous study of Labrador retrievers  
188 (Berns et al. 2017).



189 *Experimental Design*

190 **Study 1: 2D vs. 3D**

191 In each session, dogs were presented with two objects (a stuffed giraffe and a stuffed  
192 whale) and two life-sized cut-out pictures posted on foamboard of the objects (Fig 1). Each  
193 stimulus was attached to a three-foot dowel that the experimenter used to present the stimuli  
194 to the dog while inside the scanner bore. Neither object had been encountered before by the  
195 dogs. Dogs were semi-randomly split into two groups prior to scanning, 8 in the object group  
196 and 7 in the picture group. Prior to the first run, dogs were trained on the stimulus-reward  
197 associations (10 reward, 10 no-reward) based on their assigned group. Dogs were also  
198 refreshed on the stimulus-reward associations between runs (5 reward, 5 no-reward).  
199 Following each run, dogs would exit the scanner and rest or drink water.

200 Dogs in the object group were trained on object stimuli and were semi-randomly  
201 assigned the whale or giraffe as the reward stimulus. The presentation of the reward object  
202 (giraffe or whale) was immediately followed by the delivery of a food reward, and presentation  
203 of the other object was immediately followed by nothing. In the picture group, dogs were  
204 trained on picture stimuli and were semi-randomly assigned the whale or giraffe as the reward  
205 stimulus. The presentation of the reward picture (giraffe or whale) was immediately followed  
206 by the delivery of a food reward, and the other picture was immediately followed by nothing.  
207 Training on the conditioned stimuli occurred prior to each run when the dog was positioned in  
208 the scanner bore, but before scan acquisition. During scan acquisition, no stimuli were followed  
209 by the delivery of a food reward, so that dogs could not discriminate between objects and  
210 pictures based solely on food reward. To maintain general motivation to stay in the scanner,

211 food rewards were presented by the owner randomly throughout the scan session between  
212 presentations of the stimuli.

213 An event-based design was used, consisting of trained reward and trained no-reward  
214 trial types, as well as symbolic reward and symbolic no-reward trial types. Trained reward and  
215 trained no-reward trials consisted of the two conditioned stimuli associated with food reward  
216 prior to scanning (e.g. objects for half of the dogs, pictures for the other half). Symbolic reward  
217 and symbolic no-reward trials consisted of the two untrained stimuli (e.g. pictures for dogs  
218 trained on objects, and objects for dogs trained on pictures). On all trials, a stimulus was  
219 presented for a 5 s duration, followed by nothing. Trials were jittered to randomize  
220 presentation order and were separated by a variable inter-trial interval. Each dog received the  
221 same trial sequence.

222 A scan session consisted of 4 runs, lasting approximately 9 minutes per run. Each run  
223 consisted of 25 trials (5 trained reward, 5 trained no-reward, 5 symbolic reward, 5 symbolic no-  
224 reward, and 5 food rewards delivered at random), for a total of 100 trials per scan session. No  
225 trial type was repeated more than 4 times sequentially, as dogs could habituate to the  
226 continued presentation of a stimulus.

## 227 *Analyses*

228 Each subject's motion-corrected, censored, smoothed images were analyzed within a  
229 general linear model (GLM) for each voxel in the brain using 3dDeconvolve (part of the AFNI  
230 suite). Task related regressors for each experiment were modeled using AFNI's dmUBLOCK and  
231 stim\_times\_IM functions and were as follows: (1) trained reward stimulus; (2) trained no-  
232 reward stimulus; (3) symbolic reward stimulus; (4) symbolic no-reward stimulus. This function

233 created a column in the design matrix for each trial, allowing for the estimation of beta values  
234 for each trial. Data were censored for outliers as described above for the contrasts of interest.

235 A series of contrasts were pre-planned to assess main effects related to the acquisition  
236 of trained associations and whether they generalized between 2D and 3D versions. Acquisition  
237 of the trained stimulus-reward association was probed with the contrast [trained reward—  
238 trained no reward]. Transfer of the trained reward and no-reward association to the untrained  
239 stimuli was probed with the contrast [symbolic reward—symbolic no reward]. A direct  
240 association between the trained and untrained reward stimuli was tested with the contrast  
241 [trained reward – symbolic reward]. The contrast [all\_3D—all\_2D] was performed to test for  
242 perceived differences between all 3D and all 2D stimuli, regardless of training. The average  
243 difference between trained stimuli and symbolic stimuli was assessed with the contrast  
244 [(trained reward + trained no-reward)—(symbolic reward + symbolic no-reward)]. Finally, the  
245 interaction between reward and no reward stimuli and symbolism was measured with the  
246 contrast [(trained reward — trained no reward)—(symbolic reward —symbolic no reward)].

#### 247 *Region of Interest (ROI) Analysis*

##### 248 *Caudate*

249 As our interest was based on the dog's response to trained stimuli versus symbolic  
250 stimuli, quantitative analyses based on the imaging results used activation values in the canine  
251 brain area previously observed to be responsive to reward stimuli (Cook et al. 2016).

252 Anatomical ROIs of the left and right caudate nuclei were defined structurally using each dog's  
253 T2-weighted structural image. ROI-based analyses were performed in individual, rather than  
254 group space.

255           Beta values for the contrasts comparing the change in activation to reward and no  
256 reward stimuli for trained (20 reward trials, 20 no-reward trials) and symbolic stimuli (20  
257 reward trials, 20 no-reward trials) were extracted from the caudate ROIs in the left and right  
258 hemispheres. Beta values greater than an absolute four percent signal change were removed  
259 prior to analyses (assuming that these were beyond the physiologic range of the BOLD signal).  
260 The remaining beta values were analyzed using the mixed-model procedure in SPSS 24 (IBM)  
261 with fixed-effects for the intercept, group, hemisphere (left or right), and contrast type, identity  
262 covariance structure, and maximum-likelihood estimation.

### 263 *Whole Brain Analysis*

264           Each subject's individual-level contrast from the GLM was normalized to the Labrador  
265 Retriever atlas space via the ANTs software. Spatial transformations included a rigid-body mean  
266 EPI to structural image, affine structural to template, and diffeomorphic structural to template.  
267 These spatial transformations were concatenated and applied to individual contrasts from the  
268 GLM to compute group level statistics. 3dttest++, part of the AFNI suite, was used to compute a  
269 t-test across dogs against the null hypothesis that each voxel had a mean value of zero. All  
270 contrasts from the GLM mentioned above were included. The average smoothness of the  
271 residuals from each dog's time series regression model was calculated using AFNI's non-  
272 Gaussian spatial autocorrelation function 3dFWHMx -acf. The acf option leads to greatly  
273 reduced FPRs clustered around 5 percent across all voxelwise thresholds (Cox et al. 2017).  
274 AFNI's 3dClustsim was then used to estimate the significance of cluster sizes across the whole  
275 brain after correcting for familywise error (FWE). Similar to human fMRI studies, a voxel  
276 threshold of  $p \leq 0.005$  was used, and a cluster was considered significant if it exceeded the

277 critical size estimated by 3dClustsim for a FWER  $\leq 0.05$ , using two-sided thresholding and a  
278 nearest-neighbor of 1.

### 279 ***Study 2: Object Localizer***

280 To identify object-processing regions, dogs were presented with 3-s color movie clips  
281 projected on a screen in the bore of the magnet. Videos included human faces, novel objects  
282 (toys), familiar objects, and scram-bled objects (a 15 by 15 box grid with spatially rearranged  
283 movie frames.) Stimuli were presented using Python 2.7.9 and the Psychopy Experiment library.  
284 A blocked fMRI design was used where each block was 21 s with seven movie clips for each  
285 category. Each run contained two sets of four consecutive stimulus blocks in palindromic order.  
286 Stimulus blocks had a delay of 10 s, where dogs were fed intermittently between blocks, such  
287 that each run was approximately 7 minutes. On average, each dog completed three runs.

### 288 *Analyses*

289 As in Study 1, a general linear model was estimated for each voxel using AFNI's  
290 3dDeconvolve. Task related regressors were: (1) faces, (2) novel objects, (3) trained objects, and  
291 (4) scrambled objects. Individual object-specific regions, such as LOC, were identified with the  
292 contrast [novel objects—faces]. Each dog's object-specific region was defined by the voxel  
293 threshold of the statistical map for the [novel objects—faces] contrast until the number of  
294 voxels in each ROI was approximately 40 voxels or less (Aulet et al. 2019). Beta values from the  
295 contrasts of interest mentioned in Study 1 were extracted from the object-specific region of  
296 each dog to examine potential differences in neural activation between 2D and 3D objects from  
297 the contrasts mentioned above.

298

## RESULTS

### 299 **Study 1: 2D vs 3D Results**

#### 300 *Caudate ROI Analyses*

301           There was differentiation of the reward and no-reward stimuli in the caudate ROIs for  
302 the trained stimuli, regardless of whether dogs were trained on objects or pictures. There was  
303 also a significant interaction of training x [Reward – No Reward] ( $F(1,45) = 11.29, p = 0.002$ ) (Fig  
304 2). This indicates that the trained reward association did not transfer to the symbolic stimuli.

#### 305 *Whole Brain Analyses*

306           We found neural evidence for the differentiation of stimuli as an effect of the  
307 dimensionality of the training stimuli. Whole brain analysis of the contrasts of interest revealed  
308 significant activation for three contrasts (Table 2). The [trained reward—symbolic reward]  
309 contrast and the contrast comparing activation to the trained stimulus dimensionality versus  
310 the untrained stimulus dimensionality [trained reward + trained no-reward]—(symbolic reward  
311 + symbolic no-reward)] revealed a region in the posterior parietal lobe with greater activation  
312 toward the trained dimensionality of stimuli than the untrained dimensionality (Fig 3A). The  
313 contrast comparing the reward associations for the untrained dimension of stimuli [symbolic  
314 reward— symbolic no-reward] revealed a region in the right anterior parietotemporal cortex  
315 (Fig 3B).

### 316 **Study 2: Object Localizer Results**

#### 317 *Individual Object Regions*

318           Three dogs (Velcro, Rookie, and Zoey) failed to complete three runs of the object  
319 localizer task such that there was insufficient data to localize object-specific regions in the

320 brain. Twelve dogs had object selective regions defined by the contrast [novel\_objects—faces]  
321 in overlapping regions in either the left or right hemisphere (Fig. 4). We further examined these  
322 object regions for differences between 3D and 2D versions of the objects from the contrasts in  
323 Study 1. However, there were no statistically significant results for any of the contrasts in the  
324 object-specific regions across dogs.

## 325 DISCUSSION

326 Our fMRI results provide the first evidence for neural differences in the occipital and  
327 parietal cortices of the dog brain for the processing of two- and three-dimensional objects. The  
328 main finding is that dogs' perception of 2D and 3D objects is influenced by their experience with  
329 either stimulus dimension. Activation within reward processing regions was greater for the  
330 dimensionality of the trained reward stimulus. Whole-brain analyses revealed a left posterior  
331 parietal region selective for the trained dimension of stimuli over the untrained dimension.  
332 Taken together, these findings suggest that the neural representation of objects depends on  
333 dogs' familiarity with two- and three-dimensional objects.

### 334 *Object Regions*

335 In humans, viewing real objects as well as images of objects activates similar networks,  
336 particularly the lateral occipital complex along the lateral and ventral convexity of occipito-  
337 temporal cortex (Snow et al. 2011; Todd et al. 2012). However, in a human fMRI study that  
338 presented real objects and pictures of the objects, the LOC in particular was sensitive to visual  
339 differences between the two, such that LOC did not code the real (3D) and pictorial (2D)  
340 versions of a shape as equivalent (Snow et al. 2011). Because real objects afford specific  
341 actions, including the graspability of an object or if it is within reach of the dominant hand,

342 object-specific actions may have a unique effect on neural responses to the different versions  
343 of the same object stimuli (Gallivan et al. 2009; Gallivan and Culham 2015; Gallivan et al. 2011;  
344 Snow et al. 2014). Unlike humans, we found little difference in dogs' neural activation in  
345 individual object regions between 2D and 3D versions of object stimuli associated with reward.  
346 Our finding of similar neural activation in object regions of the dogs' brains to 2D and 3D  
347 versions of object stimuli could be due to dogs forming an abstract object concept that is  
348 invariant to the dimensionality of the object. However, as the object-reward pairings were  
349 acquired using a passive viewing task, dogs had little experience interacting with the objects or  
350 picture versions of the objects. The dogs' lack of action-associations with either object may  
351 therefore have made both objects and pictures of objects equivalent to the dog as neither was  
352 actionable. It is also possible that the study was insufficiently powered to detect potentially  
353 smaller effect sizes in dogs than in humans.

#### 354 *Dimensionality Regions*

355 As most studies of canine cognition rely on visual stimuli, we examined whether dogs  
356 use hedonic neural mechanisms to generalize from pictures of objects to real world objects. In  
357 the interaction contrast, we found that dogs show greater activation within the caudate  
358 nucleus to the trained dimension of stimuli relative to the untrained dimension (e.g. dogs  
359 trained on pictures of objects had greater activation to pictures relative to real world objects),  
360 suggesting hedonic neural mechanisms are biased toward the dimensionality of stimuli with  
361 which they are more familiar. Additional brain regions selective for stimulus dimensionality  
362 included a left posterior parietal region across dogs where there was greater activation to the  
363 trained dimensionality of stimuli than to the untrained dimensionality, which appeared in the



364 same region but opposite hemisphere as the LOC defined in each dog in the object localizer  
365 study. Multi-voxel pattern analysis (MVPA) of human imaging data supports these findings, as  
366 patterns in object regions can be different for object exemplars from the same category that  
367 vary based on viewpoint or size, as well as between 2D and 3D versions of the same objects  
368 (Eger et al. 2008; Snow et al. 2011). Consistent with human imaging studies, the left posterior  
369 region also showed greater activation to objects relative to faces across dogs and appeared in  
370 regions of the canine brain similar to the primate LOC (Freud et al. 2017; Freud et al. 2018).

371         There was also greater activation to the untrained reward versus no reward stimuli in a  
372 right parietotemporal region across dogs (e.g. dogs trained that the 2D giraffe was the reward  
373 stimulus had greater activation to the 3D giraffe than the 3D whale in this region). Greater  
374 activation to the untrained reward stimulus in this region provides some evidence that dogs use  
375 hedonic neural mechanisms to generalize a stimulus-reward association from the trained  
376 reward stimulus to the untrained stimulus. However, we do not know what features, such as  
377 color or shape, that the dog may use to facilitate this representation. In human fMRI, the right  
378 primary visual cortex (V1) and right inferior temporal gyrus also showed greater activation to  
379 2D versions of objects versus 3D objects (Snow et al. 2011). Our results also suggest that dorsal  
380 regions of the dog brain may process abstract features of object stimuli that include, but are  
381 not limited to, actions (Freud et al. 2017).

382         There were several limitations to our studies, the foremost being that only a subset of  
383 dogs participated in both the localizer study and the 2D-3D study. Some dogs were unavailable  
384 for both studies, and some dogs were unable to remain still while viewing video stimuli in the  
385 MRI. Further, we limited the number of objects to two or three items, which allowed for a

386 simple controlled design with many trials per item but may limit the generalizability of our  
387 findings to all objects that a dog may encounter. Unlike human imaging studies, we did not  
388 include more abstract stimuli that were composed only of lines or were limited in color to black  
389 and white. To address these concerns, future research could confirm the selectivity of object  
390 processing regions for each dog using novel stimuli.

### 391 *Conclusions*

392 Our fMRI results provide evidence for dedicated object processing regions in the  
393 occipital and parietal cortices in dogs. Although real objects and pictures of the same objects  
394 share a degree of visual similarity, they differ fundamentally in the actions associated with  
395 them and require experience with either dimension. Further, even children at age 4 can show  
396 confusion about the properties of pictures and the objects they depict and the consequences of  
397 actions on pictures and objects (Ganea et al. 2009). We have begun to understand how dogs  
398 perceive their world through brain imaging, as this offers direct insight from the participant  
399 about the neural mechanisms underlying perception. Our studies reveal that there are  
400 potentially shared neural mechanisms underlying dogs' and humans' visual perception of  
401 objects, and that neural biases may in turn affect perception and behavior. These studies  
402 provide insight into the question of whether pictures are an appropriate proxy for real world  
403 stimuli for dogs and for fMRI.

404

405

## REFERENCES

406

- 407 Albuquerque N, Guo K, Wilkinson A, Savalli C, Otta E, Mills D (2016) Dogs recognize dog and human  
408 emotions *Biol Lett* 12:20150883 doi:10.1098/rsbl.2015.0883
- 409 Aulet LS, Chiu VC, Prichard A, Spivak M, Lourenco SF, Berns GS (2019) Canine sense of quantity: evidence  
410 for numerical ratio-dependent activation in parietotemporal cortex *Biol Lett* 15:20190666  
411 doi:10.1098/rsbl.2019.0666
- 412 Autier-Derian D, Deputte BL, Chalvet-Monfray K, Coulon M, Mounier L (2013) Visual discrimination of  
413 species in dogs (*Canis familiaris*) *Anim Cogn* 16:637-651 doi:10.1007/s10071-013-0600-8
- 414 Avants BB, Tustison NJ, Song G, Cook PA, Klein A, Gee JC (2011) A reproducible evaluation of ANTs  
415 similarity metric performance in brain image registration *Neuroimage* 54:2033-2044  
416 doi:10.1016/j.neuroimage.2010.09.025
- 417 Barber AL, Randi D, Muller CA, Huber L (2016) The Processing of Human Emotional Faces by Pet and Lab  
418 Dogs: Evidence for Lateralization and Experience Effects *PLoS One* 11:e0152393  
419 doi:10.1371/journal.pone.0152393
- 420 Beauchamp MS, Lee KE, Argall BD, Martin A (2004) Integration of Auditory and Visual Information about  
421 Objects in Superior Temporal Sulcus *Neuron* 41:809-823 doi:10.1016/s0896-6273(04)00070-4
- 422 Berns GS, Brooks A, Spivak M (2013) Replicability and heterogeneity of awake unrestrained canine fMRI  
423 responses *PLoS One* 8:e81698 doi:10.1371/journal.pone.0081698
- 424 Berns GS, Brooks AM, Spivak M (2012) Functional MRI in awake unrestrained dogs *PLoS One* 7:e38027  
425 doi:10.1371/journal.pone.0038027
- 426 Berns GS, Brooks AM, Spivak M, Levy K (2017) Functional MRI in Awake Dogs Predicts Suitability for  
427 Assistance Work *Sci Rep* 7:43704 doi:10.1038/srep43704
- 428 Bovet D, Vauclair J (2000) Picture recognition in animals and humans *Behav Brain Res* 109:143-165
- 429 Byosiere S-E, Chouinard PA, Howell TJ, Bennett PC (2018) What do dogs (*Canis familiaris*) see? A review  
430 of vision in dogs and implications for cognition research *Psychon Bull Rev* 25:1798-1813  
431 doi:10.3758/s13423-017-1404-7
- 432 Byosiere S-E, Chouinard PA, Howell TJ, Bennett PC (2019) The effects of physical luminance on colour  
433 discrimination in dogs: A cautionary tale *Appl Anim Behav Sci* 212:58-65  
434 doi:10.1016/j.applanim.2019.01.004
- 435 Cook PF, Prichard A, Spivak M, Berns GS (2016) Awake canine fMRI predicts dogs' preference for praise  
436 vs food *Soc Cogn Affect Neurosci* 11:1853-1862 doi:10.1093/scan/nsw102
- 437 Cox RW, Chen G, Glen DR, Reynolds RC, Taylor PA (2017) fMRI Clustering in AFNI: False-Positive Rates  
438 Redux *Brain Connect* 7:152-171 doi:10.1089/brain.2016.0475
- 439 Cuaya LV, Hernandez-Perez R, Concha L (2016) Our Faces in the Dog's Brain: Functional Imaging Reveals  
440 Temporal Cortex Activation during Perception of Human Faces *PLoS One* 11:e0149431  
441 doi:10.1371/journal.pone.0149431
- 442 Dilks DD, Cook P, Weiller SK, Berns HP, Spivak M, Berns GS (2015) Awake fMRI reveals a specialized  
443 region in dog temporal cortex for face processing *PeerJ* 3:e1115 doi:10.7717/peerj.1115
- 444 Durand JB et al. (2007) Anterior regions of monkey parietal cortex process visual 3D shape *Neuron*  
445 55:493-505 doi:10.1016/j.neuron.2007.06.040
- 446 Eger E, Ashburner J, Haynes JD, Dolan RJ, Rees G (2008) fMRI activity patterns in human LOC carry  
447 information about object exemplars within category *J Cogn Neurosci* 20:356-370  
448 doi:10.1162/jocn.2008.20019
- 449 Freud E, Ganel T, Shelef I, Hammer MD, Avidan G, Behrmann M (2017) Three-Dimensional  
450 Representations of Objects in Dorsal Cortex are Dissociable from Those in Ventral Cortex *Cereb*  
451 *Cortex* 27:422-434 doi:10.1093/cercor/bhv229

- 452 Freud E, Macdonald SN, Chen J, Quinlan DJ, Goodale MA, Culham JC (2018) Getting a grip on reality:  
453 Grasping movements directed to real objects and images rely on dissociable neural  
454 representations *Cortex* 98:34-48 doi:10.1016/j.cortex.2017.02.020
- 455 Gallivan JP, Cavina-Pratesi C, Culham JC (2009) Is that within reach? fMRI reveals that the human  
456 superior parieto-occipital cortex encodes objects reachable by the hand *J Neurosci* 29:4381-  
457 4391 doi:10.1523/JNEUROSCI.0377-09.2009
- 458 Gallivan JP, Culham JC (2015) Neural coding within human brain areas involved in actions *Curr Opin*  
459 *Neurobiol* 33:141-149 doi:10.1016/j.conb.2015.03.012
- 460 Gallivan JP, McLean A, Culham JC (2011) Neuroimaging reveals enhanced activation in a reach-selective  
461 brain area for objects located within participants' typical hand workspaces *Neuropsychologia*  
462 49:3710-3721 doi:10.1016/j.neuropsychologia.2011.09.027
- 463 Ganea PA, Allen ML, Butler L, Carey S, DeLoache JS (2009) Toddlers' referential understanding of  
464 pictures *J Exp Child Psychol* 104:283-295 doi:10.1016/j.jecp.2009.05.008
- 465 Gomez MA, Skiba RM, Snow JC (2018) Graspable Objects Grab Attention More Than Images Do *Psychol*  
466 *Sci* 29:206-218 doi:10.1177/0956797617730599
- 467 Huber L, Racca A, Scaf B, Viranyi Z, Range F (2013) Discrimination of familiar human faces in dogs (*Canis*  
468 *familiaris*) *Learn Motiv* 44:258-269 doi:10.1016/j.lmot.2013.04.005
- 469 Hutchison RM, Gallivan JP (2018) Functional coupling between frontoparietal and occipitotemporal  
470 pathways during action and perception *Cortex* 98:8-27 doi:10.1016/j.cortex.2016.10.020
- 471 Janssen P, Verhoef BE, Premereur E (2018) Functional interactions between the macaque dorsal and  
472 ventral visual pathways during three-dimensional object vision *Cortex* 98:218-227  
473 doi:10.1016/j.cortex.2017.01.021
- 474 Jitsumori M (2010) Do Animals Recognize Pictures as Representations of 3D Objects? *Comparative*  
475 *Cognition & Behavior Reviews* 5:136-138 doi:10.3819/ccbr.2010.50008
- 476 Johnson-Ulrich Z, Vonk J, Humbyrd M, Crowley M, Wojtkowski E, Yates F, Allard S (2016) Picture object  
477 recognition in an American black bear (*Ursus americanus*) *Anim Cogn* 19:1237-1242  
478 doi:10.1007/s10071-016-1011-4
- 479 Kaminski J, Tempelmann S, Call J, Tomasello M (2009) Domestic dogs comprehend human  
480 communication with iconic signs *Dev Sci* 12:831-837 doi:10.1111/j.1467-7687.2009.00815.x
- 481 Kourtzi Z, Kanwisher N (2000) Cortical regions involved in perceiving object shape *J Neurosci* 20:3310-  
482 3318
- 483 Kriegeskorte N et al. (2008) Matching categorical object representations in inferior temporal cortex of  
484 man and monkey *Neuron* 60:1126-1141 doi:10.1016/j.neuron.2008.10.043
- 485 Miller PE, Murphy CJ (1995) Vision in dogs *J Am Vet Med Assoc* 207:1623-1634
- 486 Muller CA, Schmitt K, Barber AL, Huber L (2015) Dogs can discriminate emotional expressions of human  
487 faces *Curr Biol* 25:601-605 doi:10.1016/j.cub.2014.12.055
- 488 Pitteri E, Mongillo P, Carnier P, Marinelli L, Huber L (2014) Part-based and configural processing of  
489 owner's face in dogs *PLoS One* 9:e108176 doi:10.1371/journal.pone.0108176
- 490 Pongracz P, Miklosi A, Doka A, Csanyi V (2003) Successful Application of Video-Projected Human Images  
491 for Signalling to Dogs *Ethology* 109:809-821 doi:10.1046/j.0179-1613.2003.00923.x
- 492 Prichard A, Chhibber R, Athanassiades K, Spivak M, Berns GS (2018a) Fast neural learning in dogs: A  
493 multimodal sensory fMRI study *Sci Rep* 8:14614 doi:10.1038/s41598-018-32990-2
- 494 Prichard A, Cook PF, Spivak M, Chhibber R, Berns GS (2018b) Awake fMRI Reveals Brain Regions for  
495 Novel Word Detection in Dogs *Front Neurosci* 12:737 doi:10.3389/fnins.2018.00737
- 496 Romero CA, Snow JC (2019) Methods for Presenting Real-world Objects Under Controlled Laboratory  
497 Conditions *J Vis Exp* doi:10.3791/59762

- 498 Snow JC, Pettypiece CE, McAdam TD, McLean AD, Stroman PW, Goodale MA, Culham JC (2011) Bringing  
499 the real world into the fMRI scanner: repetition effects for pictures versus real objects *Sci Rep*  
500 1:130 doi:10.1038/srep00130
- 501 Snow JC, Skiba RM, Coleman TL, Berryhill ME (2014) Real-world objects are more memorable than  
502 photographs of objects *Front Hum Neurosci* 8:837 doi:10.3389/fnhum.2014.00837
- 503 Somppi S, Tornqvist H, Hanninen L, Krause C, Vainio O (2012) Dogs do look at images: eye tracking in  
504 canine cognition research *Anim Cogn* 15:163-174 doi:10.1007/s10071-011-0442-1
- 505 Szabo D, Gabor A, Gacsi M, Farago T, Kubinyi E, Miklosi A, Andics A (2020) On the Face of It: No  
506 Differential Sensitivity to Internal Facial Features in the Dog Brain *Front Behav Neurosci* 14:25  
507 doi:10.3389/fnbeh.2020.00025
- 508 Thompkins AM et al. (2018) Separate brain areas for processing human and dog faces as revealed by  
509 awake fMRI in dogs (*Canis familiaris*) *Learn Behav* 46:561-573 doi:10.3758/s13420-018-0352-z
- 510 Todd RM, Talmi D, Schmitz TW, Susskind J, Anderson AK (2012) Psychophysical and neural evidence for  
511 emotion-enhanced perceptual vividness *J Neurosci* 32:11201-11212  
512 doi:10.1523/JNEUROSCI.0155-12.2012
- 513 Wallis LJ, Range F, Kubinyi E, Chapagain D, Serra J, Huber L (2017) Utilising dog-computer interactions to  
514 provide mental stimulation in dogs especially during ageing *ACI 2017 Improv Relat (2017) 2017*  
515 doi:10.1145/3152130.3152146
- 516 Weisman R, Spetch M (2010) Determining When Birds Perceive Correspondence Between Pictures and  
517 Objects: A Critique *Comparative Cognition & Behavior Reviews* 5:117-131  
518 doi:10.3819/ccbr.2010.50006
- 519 Wilkinson A, Mueller-Paul J, Huber L (2013) Picture-object recognition in the tortoise *Chelonoidis*  
520 *carbonaria* *Anim Cogn* 16:99-107 doi:10.1007/s10071-012-0555-1

521 **Table 1. Dogs (N=19) and participation in experiments.**

| Dog      | Breed                    | Sex | Object    |           | S+         |
|----------|--------------------------|-----|-----------|-----------|------------|
|          |                          |     | Localizer | 2D to 3D  |            |
| Caylin   | Border collie            | F   | 1         | 1         | 3D Giraffe |
| Daisy    | Pitbull mix              | F   | 1         | 1         | 3D Giraffe |
| Eddie    | Labrador Golden mix      | M   | 1         | 1         | 2D Whale   |
| Kady     | Labrador                 | F   |           | 1         | 3D Whale   |
| Koda     | Pitbull mix              | F   | 1         | 1         | 2D Giraffe |
| Libby    | Pitbull mix              | F   | 1         | 1         | 3D Whale   |
| Mauja    | Cattle dog mix           | F   |           | 1         | 2D Whale   |
| Ohana    | Golden Retriever         | F   | 1         | 1         | 3D Whale   |
| Oliver   | Border collie Beagle mix | M   | 1         | 1         | 2D Whale   |
| Pearl    | Golden Retriever         | F   | 1         | 1         | 2D Giraffe |
| Tallulah | Carolina dog             | F   | 1         | 1         | 2D Whale   |
| Truffles | Pointer mix              | F   | 1         | 1         | 3D Giraffe |
| Tug      | Portuguese Water dog     | M   |           | 1         | 3D Giraffe |
| Zen      | Labrador Golden mix      | M   | 1         | 1         | 2D Giraffe |
| Zoey     | Goldendoodle             | F   | 1         | 1         | 3D Giraffe |
| <b>N</b> |                          |     | <b>12</b> | <b>15</b> |            |

522 Dog's names, breed, sex, and participation in experimental studies (indicated by 1) are listed. Grey denotes a dog  
 523 participated in all 3 studies.

524 **Table 2. Cluster size and threshold significance for 2D and 3D object processing regions**

| 2D3D Contrast                                                                | Region                  | Voxel threshold | Cluster Size (1 mm <sup>3</sup> voxels) |
|------------------------------------------------------------------------------|-------------------------|-----------------|-----------------------------------------|
| trained reward – symbolic reward                                             | Left posterior parietal | .005            | 454 (p<.02)                             |
| symbolic reward— symbolic no-reward                                          | Right parietotemporal   | .005            | 248 (p=.05)                             |
| (trained reward + trained no-reward)— (symbolic reward + symbolic no-reward) | Left posterior parietal | .005            | 528 (p<0.01)                            |

526

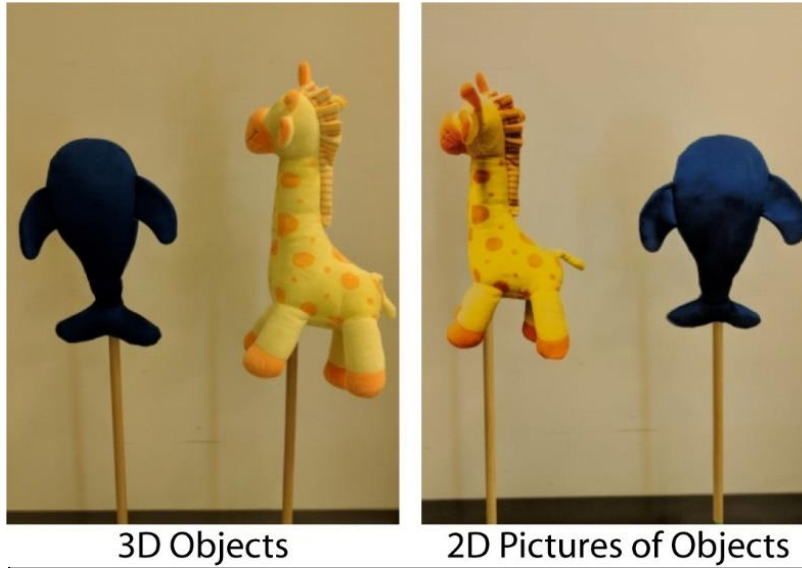

**Figure 1. 2D & 3D Stimuli.** **Left)** 3D whale and 3D giraffe objects attached to 2.5-foot dowels for presentation of stimuli to dogs while in the scanner. **Right)** Pictures of the whale and giraffe 3D objects were printed to create 2D color-matched versions of the 3D stimuli and pasted to foam board and 2.5-foot dowels for presentation of 2D stimuli to dogs while in the scanner

527

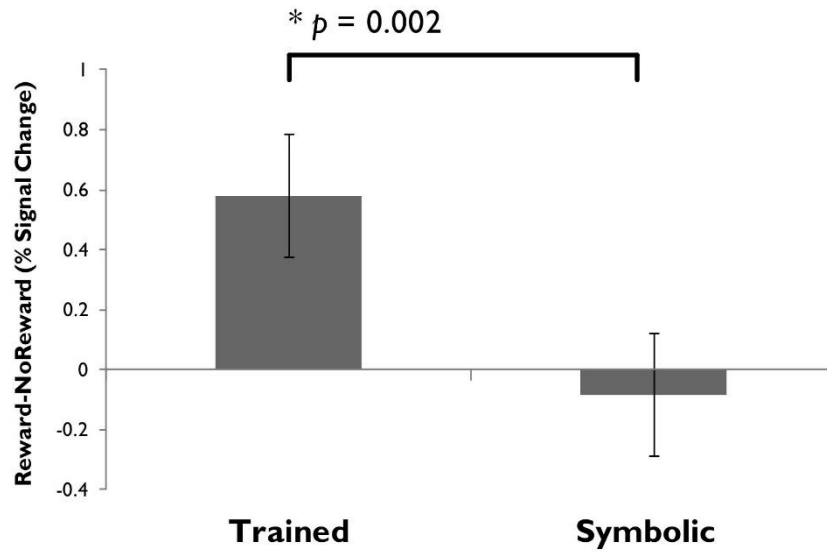

**Figure 2. Average beta values (Percent signal change) in individual dogs' caudate nucleus for the contrast of Reward—No Reward separated by training and testing (symbolic) stimuli.** Changes in brain activation were extracted from contrasts in the 2D to 3D study. In the caudate there was a significant interaction of training x [Reward – No Reward] ( $F(1,45) = 11.29, p = 0.002$ )



528

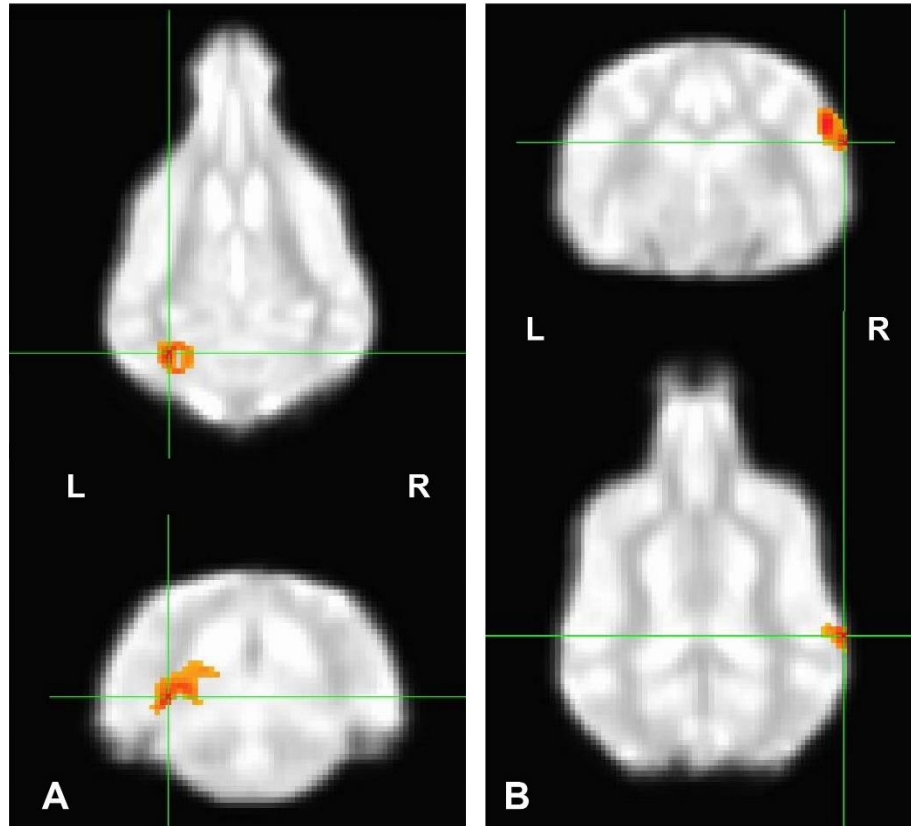

**Figure 3. Regions important for the discrimination of dimensional object stimuli.** Whole brain analysis of the contrasts of interest revealed significant activation only for three contrasts that survive a voxel threshold of 0.005. **A) The contrast comparing the trained S+ to the corresponding untrained dimension [trained reward—symbolic reward]** (454 voxels) revealed a region in the left posterior parietal lobe with greater activation toward the trained dimensionality of stimuli. **B) The contrast comparing the untrained dimension of stimuli [symbolic reward—no-reward]** (248 voxels) produced a region in the right anterior parietotemporal cortex.

529

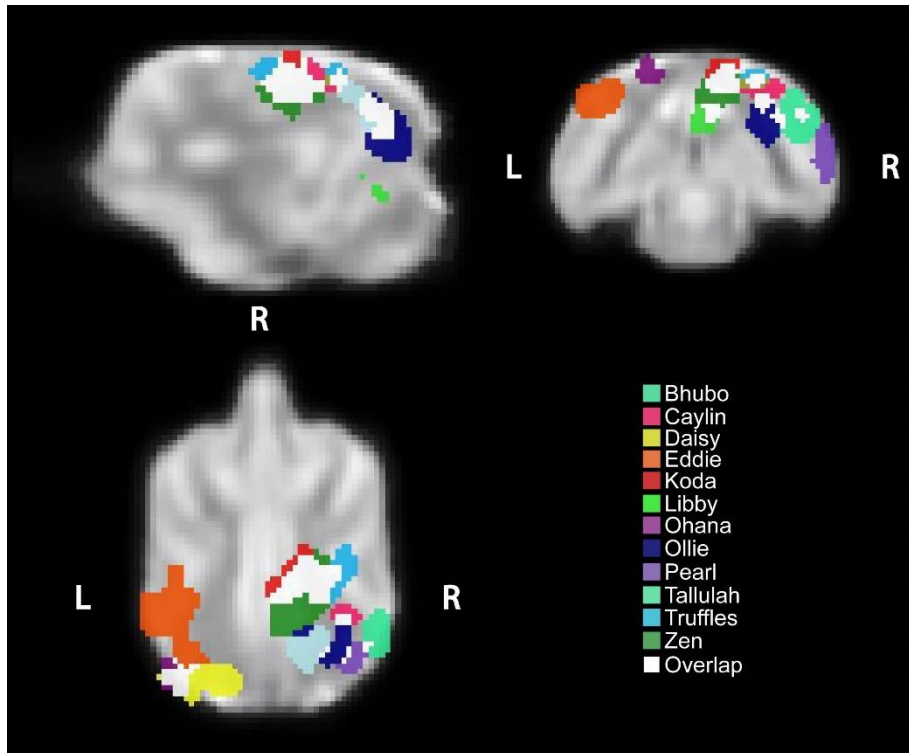

**Figure 4. Individual Dog Object Regions.** Sagittal, transverse, and dorsal sections. Regions were defined using the objects-faces contrast of video stimuli for each dog. Colors represent individual dogs; white represents overlap between two or more dogs.
